# Supplementary material
Source: publisher figshare collection journal article supplement (https://tandf.figshare.com/articles/dataset/_/5379151)

**$^{40}\text{Ar}/^{39}\text{Ar}$  Ages and Zircon Petrochronology for the Rear Arc of the Izu-Bonin-Marianas Intra-Oceanic Subduction Zone**

*Axel K. Schmitt, Kevin Konrad, Graham D. M. Andrews, Kenji Horie, Sarah R. Brown, Anthony A. Koppers, Mark Pecha, Cathy J. Busby, Yoshihiko Tamura*

Supplementary Data Set 4: Full  $^{40}\text{Ar}/^{39}\text{Ar}$  results of IODP Expedition 350 Site 1437 samples

350 U1437D 68R-2 45-49 > IODP U1437E > Plagioclase > IBM | IODP 350 (14-INT-02)  
15-OSU-04 (4A4-15) > Incremental Heating > Kevin Konrad

Information on Analysis  
and Constants Used in Calculations

Sample = 350 U1437D 68R-2 45-49  
Material = Plagioclase  
Location = IODP U1437E  
Analyst = Kevin Konrad  
Project = IBM | IODP 350 (14-INT-02)  
Mass Discrimination Law = LIN  
Irradiation = 15-OSU-04 (4A4-15)  
J = 0.00181145 ± 0.00000303  
FCT-NM = 28.201 ± 0.023 Ma  
IGSN = N/A  
Preferred Age = Plateau Age  
Classification = Crystallization Age  
Experiment Type = Incremental Heating  
Extraction Method = In Situ Laser Heating  
Heating = 0 sec  
Isolation = 3.00 min  
Instrument = ARGUS-VI-D  
Lithology = Andesitic Tuff  
Lat-Lon = Undefined - Undefined  
Collector Calibrations = <sup>36</sup>Ar  
Age Equations = Min et al. (2000)  
Negative Intensities = Allowed  
Decay Constant <sup>40</sup>K = 5.530 ± 0.048 E-10 1/a  
Decay Constant <sup>39</sup>Ar = 2.940 ± 0.016 E-07 1/h  
Decay Constant <sup>37</sup>Ar = 8.230 ± 0.012 E-04 1/h  
Decay Constant <sup>36</sup>Cl = 2.257 ± 0.015 E-06 1/a  
Decay Constant <sup>40</sup>K(EC,β<sup>+</sup>) = 0.580 ± 0.009 E-10 1/a  
Decay Constant <sup>40</sup>K(β<sup>-</sup>) = 4.950 ± 0.043 E-10 1/a  
Atmospheric Ratio <sup>40</sup>Ar/<sup>36</sup>Ar = 295.50  
Atmospheric Ratio <sup>38</sup>Ar/<sup>36</sup>Ar = 0.1869  
Production Ratio <sup>39</sup>Ar/<sup>37</sup>Ar(ca) = 0.000676 ± 0.000009  
Production Ratio <sup>38</sup>Ar/<sup>37</sup>Ar(ca) = 0.000072 ± 0.000009  
Production Ratio <sup>36</sup>Ar/<sup>37</sup>Ar(ca) = 0.000266 ± 0.000000  
Production Ratio <sup>40</sup>Ar/<sup>39</sup>Ar(k) = 0.003823 ± 0.000102  
Production Ratio <sup>38</sup>Ar/<sup>39</sup>Ar(k) = 0.012031 ± 0.000019  
Production Ratio <sup>36</sup>Ar/<sup>38</sup>Ar(cl) = 262.80 ± 1.71  
Scaling Ratio K/Ca = 0.430  
Abundance Ratio <sup>40</sup>K/K = 1.1700 ± 0.0100 E-04  
Atomic Weight K = 39.0983 ± 0.0001 g

| Results          | 40(a)/36(a) ± 2σ          | 40(r)/39(k) ± 2σ             | Age ± 2σ<br>(Ma)                                                                | MSWD                          | 39Ar(k)<br>(%,n)                                                                                                            | K/Ca ± 2σ       |
|------------------|---------------------------|------------------------------|---------------------------------------------------------------------------------|-------------------------------|-----------------------------------------------------------------------------------------------------------------------------|-----------------|
| Age Plateau      |                           | 2.02792 ± 0.01124<br>± 0.55% | 6.63 ± 0.04<br>± 0.65%<br>Full External Error ± 0.16<br>Analytical Error ± 0.04 | 1.21<br>23%<br>1.0984         | 100.00<br>22<br>2σ Confidence Limit<br>Error Magnification                                                                  | 0.0194 ± 0.0002 |
| Total Fusion Age |                           | 2.02699 ± 0.01038<br>± 0.51% | 6.63 ± 0.04<br>± 0.61%<br>Full External Error ± 0.15<br>Analytical Error ± 0.03 |                               | 22<br>0.0194 ± 0.0000                                                                                                       |                 |
| Normal Isochron  | 310.09 ± 25.22<br>± 8.13% | 2.00585 ± 0.03147<br>± 1.57% | 6.56 ± 0.11<br>± 1.60%<br>Full External Error ± 0.18<br>Analytical Error ± 0.10 | 1.25<br>20%<br>1.63<br>1.1170 | 100.00<br>22<br>2σ Confidence Limit<br>Error Magnification<br>89 Number of Iterations<br>Convergence                        |                 |
| Inverse Isochron | 309.36 ± 25.23<br>± 8.16% | 2.01207 ± 0.03075<br>± 1.53% | 6.58 ± 0.10<br>± 1.56%<br>Full External Error ± 0.18<br>Analytical Error ± 0.10 | 1.19<br>26%<br>1.0888         | 100.00<br>22<br>2σ Confidence Limit<br>Error Magnification<br>4 Number of Iterations<br>Convergence<br>30% Spreading Factor |                 |

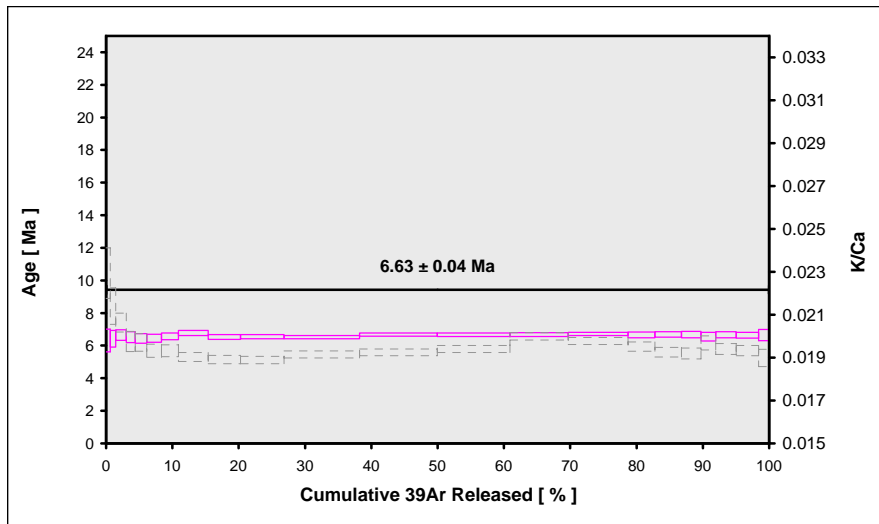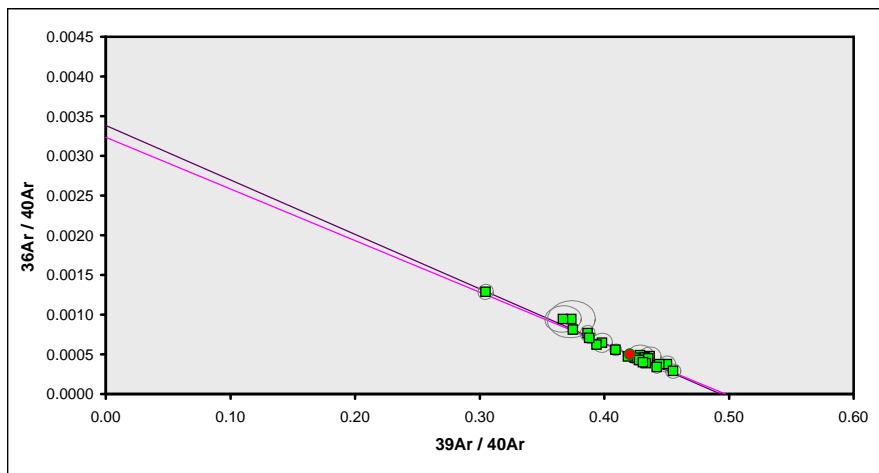

350 U1437E 15R-5 94-97 > IODP U1437E > Plagioclase > IBM | IODP 350 (14-INT-02)  
15-OSU-04 (4A10-15) > Incremental Heating > Kevin Konrad

Information on Analysis  
and Constants Used in Calculations

Sample = 350 U1437E 15R-5 94-97  
Material = Plagioclase  
Location = IODP U1437E  
Analyst = Kevin Konrad  
Project = IBM | IODP 350 (14-INT-02)  
Mass Discrimination Law = LIN  
Irradiation = 15-OSU-04 (4A10-15)  
J = 0.00179172 ± 0.00000296  
FCT-NM = 28.201 ± 0.023 Ma  
IGSN = N/A  
Preferred Age = Plateau Age  
Classification = Crystallization Age  
Experiment Type = Incremental Heating  
Extraction Method = In Situ Laser Heating  
Heating = 77 sec  
Isolation = 3.00 min  
Instrument = ARGUS-VI-D  
Lithology = Andesitic Tuff  
Lat-Lon = Undefined - Undefined  
Collector Calibrations = <sup>36</sup>Ar  
Age Equations = Min et al. (2000)  
Negative Intensities = Allowed  
Decay Constant <sup>40</sup>K = 5.530 ± 0.048 E-10 1/a  
Decay Constant <sup>39</sup>Ar = 2.940 ± 0.016 E-07 1/h  
Decay Constant <sup>37</sup>Ar = 8.230 ± 0.012 E-04 1/h  
Decay Constant <sup>36</sup>Cl = 2.257 ± 0.015 E-06 1/a  
Decay Constant <sup>40</sup>K(EC,β<sup>+</sup>) = 0.580 ± 0.009 E-10 1/a  
Decay Constant <sup>40</sup>K(β<sup>-</sup>) = 4.950 ± 0.043 E-10 1/a  
Atmospheric Ratio <sup>40</sup>Ar/<sup>36</sup>Ar = 295.50  
Atmospheric Ratio <sup>38</sup>Ar/<sup>36</sup>Ar = 0.1869  
Production Ratio <sup>39</sup>Ar/<sup>37</sup>Ar(ca) = 0.000676 ± 0.000009  
Production Ratio <sup>38</sup>Ar/<sup>37</sup>Ar(ca) = 0.000072 ± 0.000009  
Production Ratio <sup>36</sup>Ar/<sup>37</sup>Ar(ca) = 0.000266 ± 0.000000  
Production Ratio <sup>40</sup>Ar/<sup>39</sup>Ar(k) = 0.003823 ± 0.000102  
Production Ratio <sup>38</sup>Ar/<sup>39</sup>Ar(k) = 0.012031 ± 0.000019  
Production Ratio <sup>36</sup>Ar/<sup>38</sup>Ar(cl) = 262.80 ± 1.71  
Scaling Ratio K/Ca = 0.430  
Abundance Ratio <sup>40</sup>K/K = 1.1700 ± 0.0100 E-04  
Atomic Weight K = 39.0983 ± 0.0001 g

| Results          | 40(a)/36(a) ± 2σ         | 40(r)/39(k) ± 2σ             | Age ± 2σ (Ma)                                                                   | MSWD                          | <sup>39</sup> Ar(k) (%.)                                  | K/Ca ± 2σ       |
|------------------|--------------------------|------------------------------|---------------------------------------------------------------------------------|-------------------------------|-----------------------------------------------------------|-----------------|
| Age Plateau      |                          | 2.50370 ± 0.03758<br>± 1.50% | 8.09 ± 0.12<br>± 1.53%<br>Full External Error ± 0.22<br>Analytical Error ± 0.12 | 1.48<br>10%<br>1.71<br>1.2155 | 95.42<br>17<br>2σ Confidence Limit<br>Error Magnification | 0.0072 ± 0.0012 |
| Total Fusion Age |                          | 2.49289 ± 0.03297<br>± 1.32% | 8.06 ± 0.11<br>± 1.36%<br>Full External Error ± 0.21<br>Analytical Error ± 0.11 |                               | 22                                                        | 0.0073 ± 0.0000 |
| Normal Isochron  | 294.13 ± 7.74<br>± 2.63% | 2.51324 ± 0.09255<br>± 3.68% | 8.12 ± 0.30<br>± 3.69%<br>Full External Error ± 0.35<br>Analytical Error ± 0.30 | 1.54<br>8%<br>1.73<br>1.2409  | 95.42<br>17<br>2σ Confidence Limit<br>Error Magnification |                 |
|                  |                          |                              |                                                                                 | 18<br>0.0000235697            | Number of Iterations<br>Convergence                       |                 |
| Inverse Isochron | 293.59 ± 7.77<br>± 2.65% | 2.52509 ± 0.09226<br>± 3.65% | 8.16 ± 0.30<br>± 3.66%<br>Full External Error ± 0.35<br>Analytical Error ± 0.30 | 1.56<br>7%<br>1.73<br>1.2507  | 95.42<br>17<br>2σ Confidence Limit<br>Error Magnification |                 |
|                  |                          |                              |                                                                                 | 4<br>0.0000206728             | Number of Iterations<br>Convergence                       |                 |
|                  |                          |                              |                                                                                 | 37%                           | Spreading Factor                                          |                 |

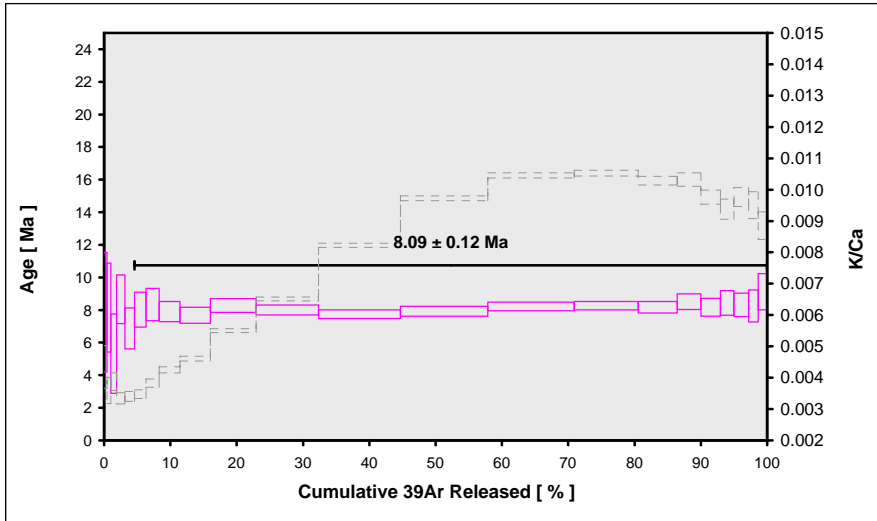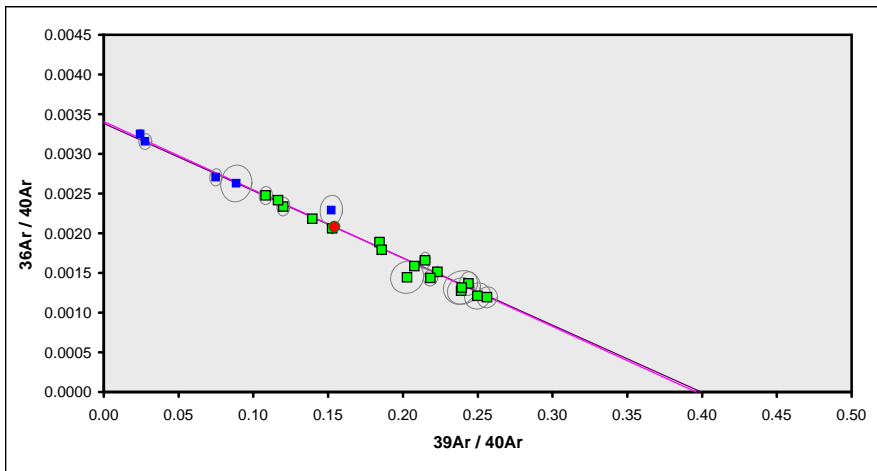

350 U1437E 17R-3 13-16 > IODP U1437E > Plagioclase > IBM | IODP 350 (14-INT-02)  
15-OSU-04 (4A8-15) > Incremental Heating > Kevin Konrad

Information on Analysis  
and Constants Used in Calculations

Sample = 350 U1437E 17R-3 13-16  
Material = Plagioclase  
Location = IODP U1437E  
Analyst = Kevin Konrad  
Project = IBM | IODP 350 (14-INT-02)  
Mass Discrimination Law = LIN  
Irradiation = 15-OSU-04 (4A8-15)  
J = 0.00179883 ± 0.00000299  
FCT-NM = 28.201 ± 0.023 Ma  
IGSN = N/A  
Preferred Age = Plateau Age  
Classification = Crystallization Age  
Experiment Type = Incremental Heating  
Extraction Method = In Situ Laser Heating  
Heating = 0 sec  
Isolation = 3.00 min  
Instrument = ARGUS-VI-D  
Lithology = Andesitic Tuff  
Lat-Lon = Undefined - Undefined  
Collector Calibrations = <sup>36</sup>Ar  
Age Equations = Min et al. (2000)  
Negative Intensities = Allowed  
Decay Constant <sup>40</sup>K = 5.530 ± 0.048 E-10 1/a  
Decay Constant <sup>39</sup>Ar = 2.940 ± 0.016 E-07 1/h  
Decay Constant <sup>37</sup>Ar = 8.230 ± 0.012 E-04 1/h  
Decay Constant <sup>36</sup>Cl = 2.257 ± 0.015 E-06 1/a  
Decay Constant <sup>40</sup>K(EC,β<sup>+</sup>) = 0.580 ± 0.009 E-10 1/a  
Decay Constant <sup>40</sup>K(β<sup>-</sup>) = 4.950 ± 0.043 E-10 1/a  
Atmospheric Ratio <sup>40</sup>Ar/<sup>36</sup>Ar = 295.50  
Atmospheric Ratio <sup>38</sup>Ar/<sup>36</sup>Ar = 0.1869  
Production Ratio <sup>39</sup>Ar/<sup>37</sup>Ar(ca) = 0.000676 ± 0.000009  
Production Ratio <sup>38</sup>Ar/<sup>37</sup>Ar(ca) = 0.000072 ± 0.000009  
Production Ratio <sup>36</sup>Ar/<sup>37</sup>Ar(ca) = 0.000266 ± 0.000000  
Production Ratio <sup>40</sup>Ar/<sup>39</sup>Ar(k) = 0.003823 ± 0.000102  
Production Ratio <sup>38</sup>Ar/<sup>39</sup>Ar(k) = 0.012031 ± 0.000019  
Production Ratio <sup>36</sup>Ar/<sup>38</sup>Ar(cl) = 262.80 ± 1.71  
Scaling Ratio K/Ca = 0.430  
Abundance Ratio <sup>40</sup>K/K = 1.1700 ± 0.0100 E-04  
Atomic Weight K = 39.0983 ± 0.0001 g

| Results                 | 40(a)/36(a) ± 2σ           | 40(r)/39(k) ± 2σ             | Age ± 2σ<br>(Ma)                                      | MSWD               | <sup>39</sup> Ar(k)<br>(%,n)               | K/Ca ± 2σ       |
|-------------------------|----------------------------|------------------------------|-------------------------------------------------------|--------------------|--------------------------------------------|-----------------|
| <b>Age Plateau</b>      |                            |                              |                                                       |                    |                                            |                 |
| <b>Error Mean</b>       |                            | 2.74759 ± 0.02383<br>± 0.87% | 8.92 ± 0.08<br>± 0.93%                                | 3.38<br>0%         | 89.96<br>14                                | 0.0167 ± 0.0003 |
|                         |                            |                              | Full External Error ± 0.22<br>Analytical Error ± 0.08 | 1.78<br>1.8376     | 2σ Confidence Limit<br>Error Magnification |                 |
| <b>Total Fusion Age</b> |                            | 2.74454 ± 0.01285<br>± 0.47% | 8.91 ± 0.05<br>± 0.57%                                |                    | 22                                         | 0.0167 ± 0.0000 |
|                         |                            |                              | Full External Error ± 0.21<br>Analytical Error ± 0.04 |                    |                                            |                 |
| <b>Normal Isochron</b>  |                            |                              |                                                       |                    |                                            |                 |
| <b>Error Chron</b>      | 302.77 ± 29.78<br>± 9.83%  | 2.71952 ± 0.09924<br>± 3.65% | 8.82 ± 0.32<br>± 3.66%                                | 3.45<br>0%         | 89.96<br>14                                |                 |
|                         |                            |                              | Full External Error ± 0.38<br>Analytical Error ± 0.32 | 1.82<br>1.8562     | 2σ Confidence Limit<br>Error Magnification |                 |
|                         |                            |                              |                                                       | 59<br>0.0000259230 | Number of Iterations<br>Convergence        |                 |
| <b>Inverse Isochron</b> |                            |                              |                                                       |                    |                                            |                 |
| <b>Error Chron</b>      | 303.93 ± 30.88<br>± 10.16% | 2.72067 ± 0.10042<br>± 3.69% | 8.83 ± 0.33<br>± 3.70%                                | 3.58<br>0%         | 89.96<br>14                                |                 |
|                         |                            |                              | Full External Error ± 0.38<br>Analytical Error ± 0.33 | 1.82<br>1.8924     | 2σ Confidence Limit<br>Error Magnification |                 |
|                         |                            |                              |                                                       | 3<br>0.0000891159  | Number of Iterations<br>Convergence        |                 |
|                         |                            |                              |                                                       | 17%                | Spreading Factor                           |                 |

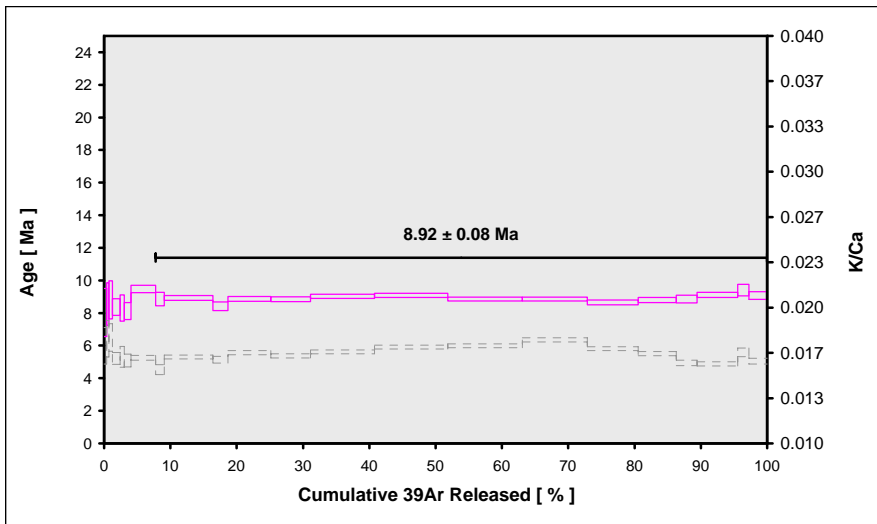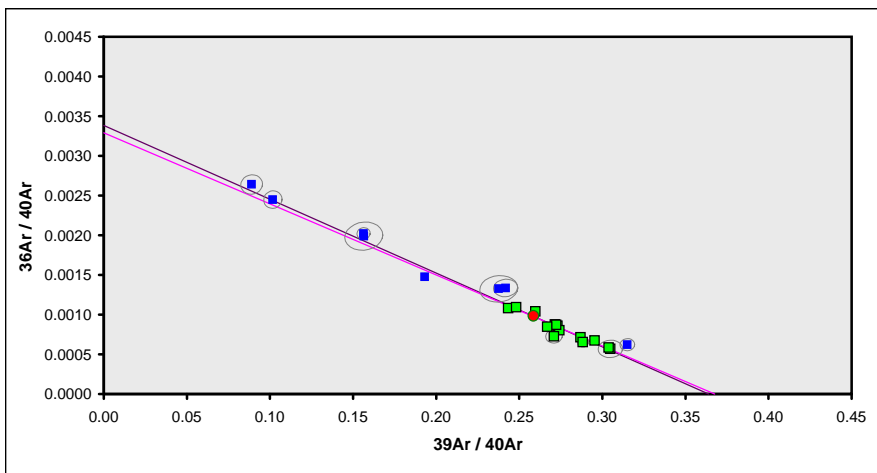

350 U1437E 19R-1 126-130 > IODP U1437E > Amphibole > IBM | IODP 350 (14-INT-02)  
15-OSU-04 (4A15-15) > Incremental Heating > Kevin Konrad

Information on Analysis  
and Constants Used in Calculations

Sample = 350 U1437E 19R-1 126-130  
Material = Amphibole  
Location = IODP U1437E  
Analyst = Kevin Konrad  
Project = IBM | IODP 350 (14-INT-02)  
Mass Discrimination Law = LIN  
Irradiation = 15-OSU-04 (4A15-15)  
J = 0.00177485 ± 0.00000291  
FCT-NM = 28.201 ± 0.023 Ma  
IGSN = N/A  
Preferred Age = Plateau Age  
Classification = Crystallization Age  
Experiment Type = Incremental Heating  
Extraction Method = In Situ Laser Heating  
Heating = 0 sec  
Isolation = 3.00 min  
Instrument = ARGUS-VI-D  
Lithology = Andesitic Tuff  
Lat-Lon = Undefined - Undefined  
Collector Calibrations = <sup>36</sup>Ar  
Age Equations = Min et al. (2000)  
Negative Intensities = Allowed  
Decay Constant <sup>40</sup>K = 5.530 ± 0.048 E-10 1/a  
Decay Constant <sup>39</sup>Ar = 2.940 ± 0.016 E-07 1/h  
Decay Constant <sup>37</sup>Ar = 8.230 ± 0.012 E-04 1/h  
Decay Constant <sup>36</sup>Cl = 2.257 ± 0.015 E-06 1/a  
Decay Constant 40K(EC,β<sup>+</sup>) = 0.580 ± 0.009 E-10 1/a  
Decay Constant 40K(β<sup>-</sup>) = 4.950 ± 0.043 E-10 1/a  
Atmospheric Ratio 40/36(a) = 295.50  
Atmospheric Ratio 38/36(a) = 0.1869  
Production Ratio 39/37(ca) = 0.000676 ± 0.000009  
Production Ratio 38/37(ca) = 0.000072 ± 0.000009  
Production Ratio 36/37(ca) = 0.000266 ± 0.000000  
Production Ratio 40/39(k) = 0.003823 ± 0.000102  
Production Ratio 38/39(k) = 0.012031 ± 0.000019  
Production Ratio 36/38(cl) = 262.80 ± 1.71  
Scaling Ratio K/Ca = 0.430  
Abundance Ratio 40K/K = 1.1700 ± 0.0100 E-04  
Atomic Weight K = 39.0983 ± 0.0001 g

| Results          | 40(a)/36(a) ± 2σ          | 40(r)/39(k) ± 2σ             | Age ± 2σ<br>(Ma)                                                                | MSWD        | <sup>39</sup> Ar(k)<br>(%,n) | K/Ca ± 2σ                                                                                                                      |
|------------------|---------------------------|------------------------------|---------------------------------------------------------------------------------|-------------|------------------------------|--------------------------------------------------------------------------------------------------------------------------------|
| Age Plateau      |                           | 2.76601 ± 0.02801<br>± 1.01% | 8.86 ± 0.09<br>± 1.06%<br>Full External Error ± 0.22<br>Analytical Error ± 0.09 | 1.33<br>26% | 100.00<br>4                  | 0.0432 ± 0.0008<br>2σ Confidence Limit<br>Error Magnification                                                                  |
| Total Fusion Age |                           | 2.77425 ± 0.02630<br>± 0.95% | 8.88 ± 0.09<br>± 1.00%<br>Full External Error ± 0.22<br>Analytical Error ± 0.08 |             | 4                            | 0.0433 ± 0.0003                                                                                                                |
| Normal Isochron  | 310.52 ± 18.38<br>± 5.92% | 2.72315 ± 0.05804<br>± 2.13% | 8.72 ± 0.19<br>± 2.15%<br>Full External Error ± 0.27<br>Analytical Error ± 0.19 | 0.53<br>59% | 100.00<br>4                  | 0.0432 ± 0.0008<br>2σ Confidence Limit<br>Error Magnification<br>22 Number of Iterations<br>Convergence                        |
| Inverse Isochron | 310.83 ± 18.44<br>± 5.93% | 2.72254 ± 0.05823<br>± 2.14% | 8.72 ± 0.19<br>± 2.16%<br>Full External Error ± 0.27<br>Analytical Error ± 0.19 | 0.54<br>58% | 100.00<br>4                  | 0.0432 ± 0.0008<br>2σ Confidence Limit<br>Error Magnification<br>3 Number of Iterations<br>Convergence<br>46% Spreading Factor |

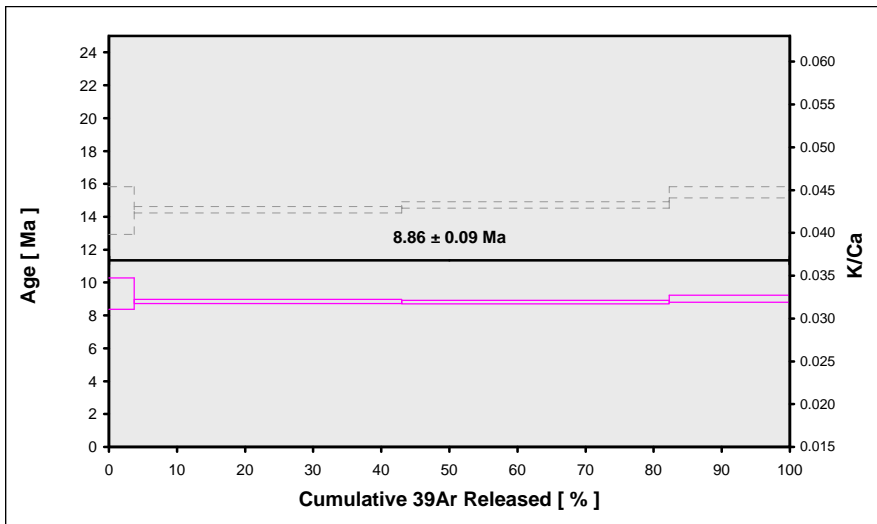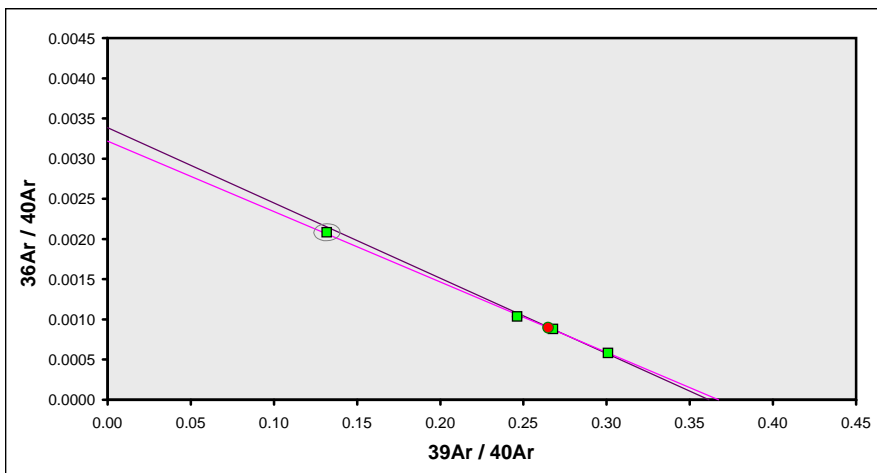

350 U1437E 19R-1 126-130 > IODP U1437E > Plagioclase > IBM | IODP 350 (14-INT-02)  
15-OSU-04 (4A14-15) > Incremental Heating > Kevin Konrad

Information on Analysis  
and Constants Used in Calculations

Sample = 350 U1437E 19R-1 126-130  
Material = Plagioclase  
Location = IODP U1437E  
Analyst = Kevin Konrad  
Project = IBM | IODP 350 (14-INT-02)  
Mass Discrimination Law = LIN  
Irradiation = 15-OSU-04 (4A14-15)  
J = 0.00177841 ± 0.00000292  
FCT-NM = 28.201 ± 0.023 Ma  
IGSN = N/A  
Preferred Age = Undefined  
Classification = Undefined  
Experiment Type = Incremental Heating  
Extraction Method = In Situ Laser Heating  
Heating = 0 sec  
Isolation = 3.00 min  
Instrument = ARGUS-VI-D  
Lithology = Andesitic Tuff  
Lat-Lon = Undefined - Undefined  
Collector Calibrations = 36Ar  
Age Equations = Min et al. (2000)  
Negative Intensities = Allowed  
Decay Constant 40K = 5.530 ± 0.048 E-10 1/a  
Decay Constant 39Ar = 2.940 ± 0.016 E-07 1/h  
Decay Constant 37Ar = 8.230 ± 0.012 E-04 1/h  
Decay Constant 36Cl = 2.257 ± 0.015 E-06 1/a  
Decay Constant 40K(EC,β<sup>+</sup>) = 0.580 ± 0.009 E-10 1/a  
Decay Constant 40K(β<sup>-</sup>) = 4.950 ± 0.043 E-10 1/a  
Atmospheric Ratio 40/36(a) = 295.50  
Atmospheric Ratio 38/36(a) = 0.1869  
Production Ratio 39/37(ca) = 0.000676 ± 0.000009  
Production Ratio 38/37(ca) = 0.000072 ± 0.000009  
Production Ratio 36/37(ca) = 0.000266 ± 0.000000  
Production Ratio 40/39(k) = 0.003823 ± 0.000102  
Production Ratio 38/39(k) = 0.012031 ± 0.000019  
Production Ratio 36/38(cl) = 262.80 ± 1.71  
Scaling Ratio K/Ca = 0.430  
Abundance Ratio 40K/K = 1.1700 ± 0.0100 E-04  
Atomic Weight K = 39.0983 ± 0.0001 g

Results

40(a)/36(a) ± 2σ

40(r)/39(k) ± 2σ

Age ± 2σ  
(Ma)

MSWD

39Ar(k)  
(%,n)

K/Ca ± 2σ

Age Plateau  
Cannot Calculate

Total Fusion Age

2.98466 ± 0.01088  
± 0.36%

9.57 ± 0.05  
± 0.49%

12

0.0292 ± 0.0001

Full External Error ± 0.22  
Analytical Error ± 0.03

Normal Isochron  
Cannot Calculate

Inverse Isochron  
Cannot Calculate

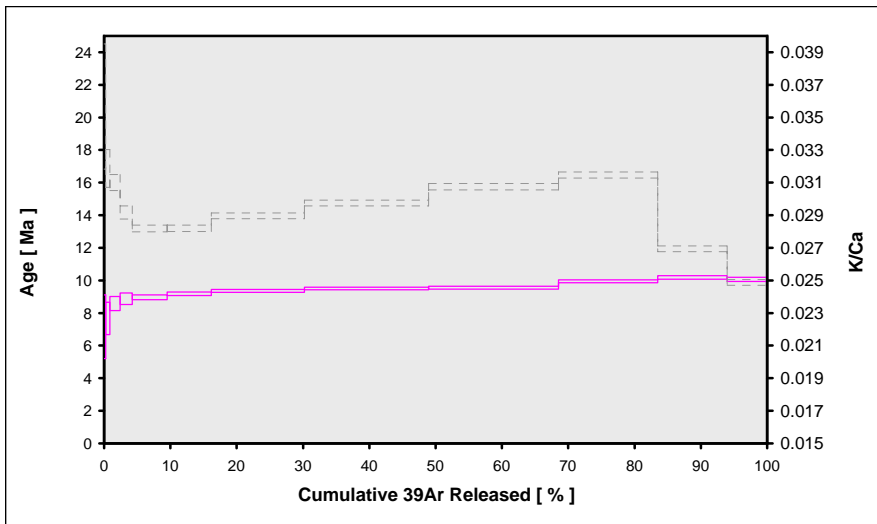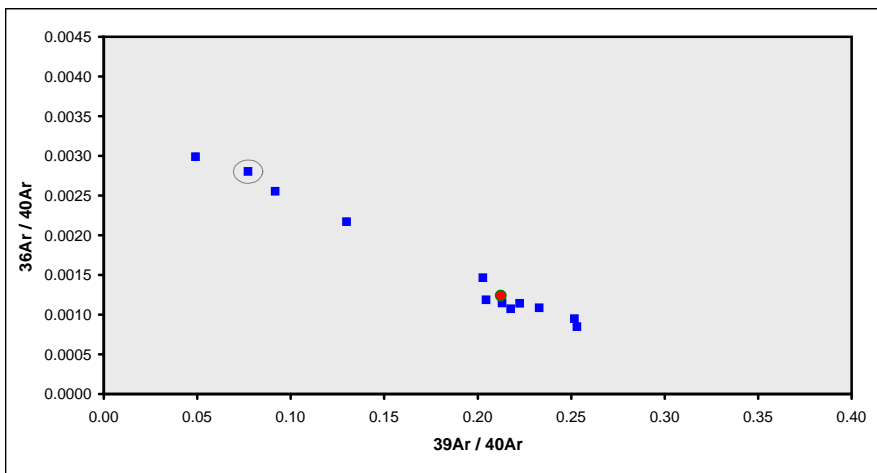

350-U1437E-35R-1 133/142 (300-212ÅμM) > IODP U1437E > Hornblende > IBM | IODP 350  
(14-INT-02)  
14-OSU-04 (R98) > Incremental Heating > Kevin Konrad

Information on Analysis  
and Constants Used in Calculations

Sample = 350-U1437E-35R-1 133/142 (300-212ÅμM)  
Material = Hornblende  
Location = IODP U1437E  
Analyst = Kevin Konrad  
Project = IBM | IODP 350 (14-INT-02)  
Mass Discrimination Law = LIN  
Irradiation = 14-OSU-04 (R98)  
J = 0.00166275 ± 0.00000210  
FCT-NM = 28.201 ± 0.023 Ma  
IGSN = N/A  
Preferred Age = Plateau Age  
Classification = Crystallization Age  
Experiment Type = Incremental Heating  
Extraction Method = In Situ Laser Heating  
Heating = 77 sec  
Isolation = 6.00 min  
Instrument = ARGUS-VI-D  
Lithology = Rhyolite  
Lat-Lon = Undefined - Undefined  
Collector Calibrations = 40Ar 36Ar  
Age Equations = Min et al. (2000)  
Negative Intensities = Allowed  
Decay Constant 40K = 5.530 ± 0.048 E-10 1/a  
Decay Constant 39Ar = 2.940 ± 0.016 E-07 1/h  
Decay Constant 37Ar = 8.230 ± 0.012 E-04 1/h  
Decay Constant 36Cl = 2.257 ± 0.015 E-06 1/a  
Decay Constant 40K(EC,β<sup>+</sup>) = 0.580 ± 0.009 E-10 1/a  
Decay Constant 40K(β<sup>-</sup>) = 4.950 ± 0.043 E-10 1/a  
Atmospheric Ratio 40/36(a) = 295.50  
Atmospheric Ratio 38/36(a) = 0.1869  
Production Ratio 39/37(ca) = 0.000676 ± 0.000009  
Production Ratio 38/37(ca) = 0.000072 ± 0.000009  
Production Ratio 36/37(ca) = 0.000266 ± 0.000000  
Production Ratio 40/39(k) = 0.003823 ± 0.000102  
Production Ratio 38/39(k) = 0.012031 ± 0.000019  
Production Ratio 36/38(cl) = 262.80 ± 1.71  
Scaling Ratio K/Ca = 0.430  
Abundance Ratio 40K/K = 1.1700 ± 0.0100 E-04  
Atomic Weight K = 39.0983 ± 0.0001 g

| Results          | 40(a)/36(a) ± 2σ         | 40(r)/39(k) ± 2σ             | Age ± 2σ<br>(Ma)                                      | MSWD               | 39Ar(k)<br>(%,n)                           | K/Ca ± 2σ       |
|------------------|--------------------------|------------------------------|-------------------------------------------------------|--------------------|--------------------------------------------|-----------------|
| Age Plateau      |                          | 4.30770 ± 0.05115<br>± 1.19% | 12.91 ± 0.16<br>± 1.21%                               | 1.09<br>37%        | 97.34<br>9                                 | 0.0090 ± 0.0001 |
|                  |                          |                              | Full External Error ± 0.33<br>Analytical Error ± 0.15 | 2.00<br>1.0430     | 2σ Confidence Limit<br>Error Magnification |                 |
| Total Fusion Age |                          | 4.25414 ± 0.05710<br>± 1.34% | 12.75 ± 0.17<br>± 1.36%                               |                    | 17                                         | 0.0090 ± 0.0001 |
|                  |                          |                              | Full External Error ± 0.34<br>Analytical Error ± 0.17 |                    |                                            |                 |
| Normal Isochron  | 292.70 ± 4.90<br>± 1.67% | 4.35274 ± 0.09577<br>± 2.20% | 13.04 ± 0.29<br>± 2.21%                               | 1.06<br>39%        | 97.34<br>9                                 | 0.0090 ± 0.0001 |
|                  |                          |                              | Full External Error ± 0.41<br>Analytical Error ± 0.29 | 2.07<br>1.0276     | 2σ Confidence Limit<br>Error Magnification |                 |
|                  |                          |                              |                                                       | 22<br>0.0000380595 | Number of Iterations<br>Convergence        |                 |
| Inverse Isochron | 292.82 ± 4.93<br>± 1.68% | 4.35265 ± 0.09620<br>± 2.21% | 13.04 ± 0.29<br>± 2.22%                               | 1.07<br>38%        | 97.34<br>9                                 | 0.0090 ± 0.0001 |
|                  |                          |                              | Full External Error ± 0.41<br>Analytical Error ± 0.29 | 2.07<br>1.0335     | 2σ Confidence Limit<br>Error Magnification |                 |
|                  |                          |                              |                                                       | 3<br>0.0000855875  | Number of Iterations<br>Convergence        |                 |
|                  |                          |                              |                                                       | 41%                | Spreading Factor                           |                 |

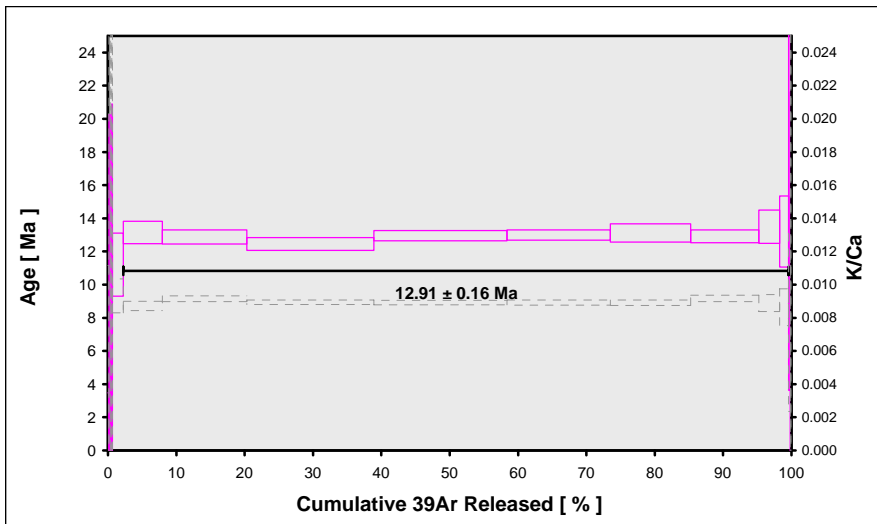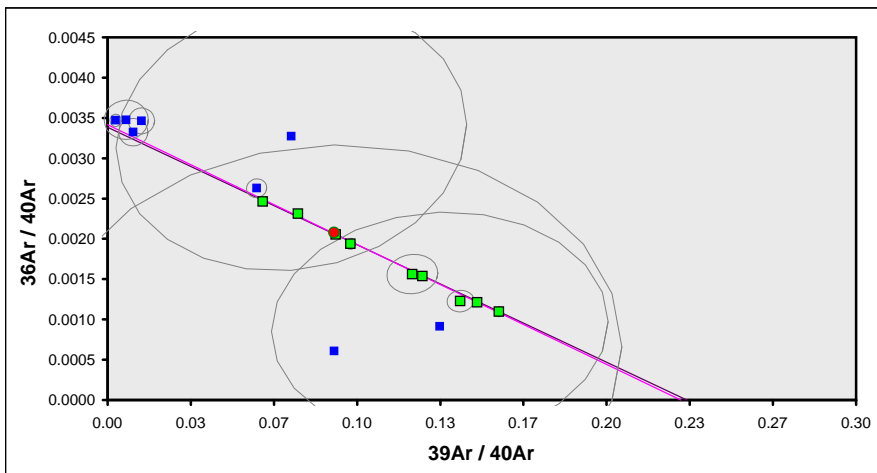

350 U1437E 43R-2 105-109 > IODP U1437E > Plagioclase > IBM | IODP 350 (14-INT-02)  
15-OSU-04 (4A11-15) > Incremental Heating > Kevin Konrad

Information on Analysis  
and Constants Used in Calculations

Sample = 350 U1437E 43R-2 105-109  
Material = Plagioclase  
Location = IODP U1437E  
Analyst = Kevin Konrad  
Project = IBM | IODP 350 (14-INT-02)  
Mass Discrimination Law = LIN  
Irradiation = 15-OSU-04 (4A11-15)  
J = 0.00178827 ± 0.00000295  
FCT-NM = 28.201 ± 0.023 Ma  
IGSN = N/A  
Preferred Age = Plateau Age  
Classification = Crystallization Age  
Experiment Type = Incremental Heating  
Extraction Method = In Situ Laser Heating  
Heating = 0 sec  
Isolation = 3.00 min  
Instrument = ARGUS-VI-D  
Lithology = Andesitic Tuff  
Lat-Lon = Undefined - Undefined  
Collector Calibrations = 36Ar  
Age Equations = Min et al. (2000)  
Negative Intensities = Allowed  
Decay Constant 40K = 5.530 ± 0.048 E-10 1/a  
Decay Constant 39Ar = 2.940 ± 0.016 E-07 1/h  
Decay Constant 37Ar = 8.230 ± 0.012 E-04 1/h  
Decay Constant 36Cl = 2.257 ± 0.015 E-06 1/a  
Decay Constant 40K(EC,β<sup>+</sup>) = 0.580 ± 0.009 E-10 1/a  
Decay Constant 40K(β<sup>-</sup>) = 4.950 ± 0.043 E-10 1/a  
Atmospheric Ratio 40/36(a) = 295.50  
Atmospheric Ratio 38/36(a) = 0.1869  
Production Ratio 39/37(ca) = 0.000676 ± 0.000009  
Production Ratio 38/37(ca) = 0.000072 ± 0.000009  
Production Ratio 36/37(ca) = 0.000266 ± 0.000000  
Production Ratio 40/39(k) = 0.003823 ± 0.000102  
Production Ratio 38/39(k) = 0.012031 ± 0.000019  
Production Ratio 36/38(cl) = 262.80 ± 1.71  
Scaling Ratio K/Ca = 0.430  
Abundance Ratio 40K/K = 1.1700 ± 0.0100 E-04  
Atomic Weight K = 39.0983 ± 0.0001 g

| Results                 | 40(a)/36(a) ± 2σ      | 40(r)/39(k) ± 2σ          | Age ± 2σ (Ma)                                                                 | MSWD         | 39Ar(k) (%n)      | K/Ca ± 2σ       |
|-------------------------|-----------------------|---------------------------|-------------------------------------------------------------------------------|--------------|-------------------|-----------------|
| <b>Age Plateau</b>      |                       | 3.77118 ± 0.13998 ± 3.71% | 12.15 ± 0.45 ± 3.71%<br>Full External Error ± 0.53<br>Analytical Error ± 0.45 | 0.97<br>47%  | 63.74<br>12       | 0.0013 ± 0.0001 |
| <b>Total Fusion Age</b> |                       | 3.96832 ± 0.11282 ± 2.84% | 12.79 ± 0.36 ± 2.85%<br>Full External Error ± 0.46<br>Analytical Error ± 0.36 |              | 22                | 0.0014 ± 0.0000 |
| <b>Normal Isochron</b>  | 293.15 ± 9.54 ± 3.25% | 3.78008 ± 0.21842 ± 5.78% | 12.18 ± 0.70 ± 5.77%<br>Full External Error ± 0.75<br>Analytical Error ± 0.70 | 1.06<br>39%  | 63.74<br>12       | 0.0013 ± 0.0001 |
| <b>Inverse Isochron</b> | 292.55 ± 9.33 ± 3.19% | 3.82545 ± 0.21112 ± 5.52% | 12.33 ± 0.68 ± 5.51%<br>Full External Error ± 0.73<br>Analytical Error ± 0.68 | 1.01<br>43%  | 63.74<br>12       | 0.0013 ± 0.0001 |
|                         |                       |                           |                                                                               | 0.0000332779 | 23<br>Convergence |                 |
|                         |                       |                           |                                                                               | 0.0000170727 | 3<br>Convergence  |                 |
|                         |                       |                           |                                                                               | 54%          | Spreading Factor  |                 |

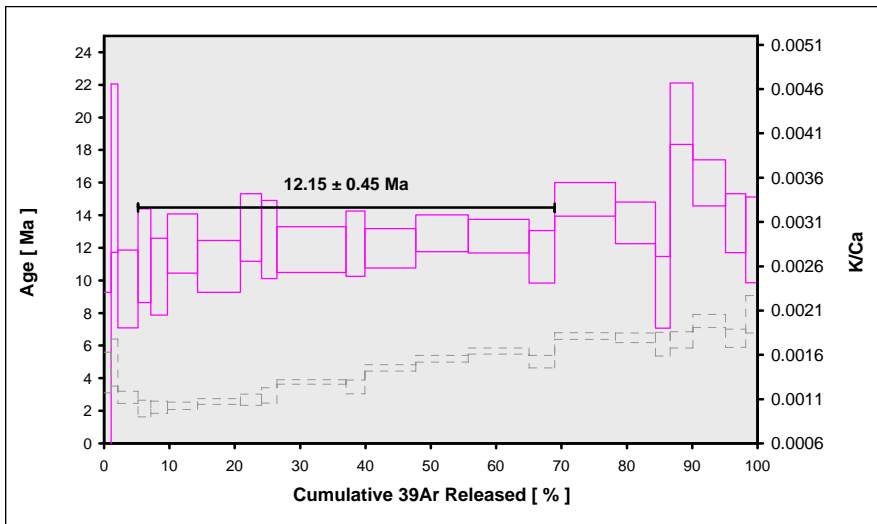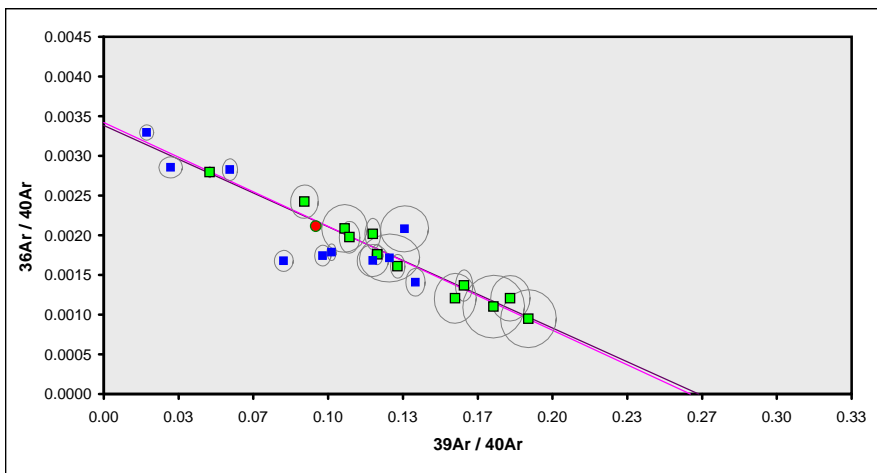



350 U1437E 43R-2 105-109 > IODP U1437E > Plagioclase > IBM | IODP 350 (14-INT-02)  
15-OSU-04 (4A11-15) > Incremental Heating > Kevin Konrad

Information on Analysis  
and Constants Used in Calculations

Sample = 350 U1437E 43R-2 105-109  
Material = Plagioclase  
Location = IODP U1437E  
Analyst = Kevin Konrad  
Project = IBM | IODP 350 (14-INT-02)  
Mass Discrimination Law = LIN  
Irradiation = 15-OSU-04 (4A11-15)  
J = 0.00178827 ± 0.00000295  
FCT-NM = 28.201 ± 0.023 Ma  
IGSN = N/A  
Preferred Age = Plateau Age  
Classification = Crystallization Age  
Experiment Type = Incremental Heating  
Extraction Method = In Situ Laser Heating  
Heating = 77 sec  
Isolation = 1.50 min  
Instrument = ARGUS-VI-D  
Lithology = Andesitic Tuff  
Lat-Lon = Undefined - Undefined  
Collector Calibrations = 36Ar  
Age Equations = Min et al. (2000)  
Negative Intensities = Allowed  
Decay Constant 40K = 5.530 ± 0.048 E-10 1/a  
Decay Constant 39Ar = 2.940 ± 0.016 E-07 1/h  
Decay Constant 37Ar = 8.230 ± 0.012 E-04 1/h  
Decay Constant 36Cl = 2.257 ± 0.015 E-06 1/a  
Decay Constant 40K(β<sup>-</sup>) = 0.580 ± 0.009 E-10 1/a  
Decay Constant 40K(β<sup>+</sup>) = 4.950 ± 0.043 E-10 1/a  
Atmospheric Ratio 40/36(a) = 295.50  
Atmospheric Ratio 38/36(a) = 0.1869  
Production Ratio 39/37(ca) = 0.000676 ± 0.000009  
Production Ratio 38/37(ca) = 0.000072 ± 0.000009  
Production Ratio 36/37(ca) = 0.000266 ± 0.000000  
Production Ratio 40/39(k) = 0.003823 ± 0.000102  
Production Ratio 38/39(k) = 0.012031 ± 0.000019  
Production Ratio 36/38(cl) = 262.80 ± 1.71  
Scaling Ratio K/Ca = 0.430  
Abundance Ratio 40K/K = 1.1700 ± 0.0100 E-04  
Atomic Weight K = 39.0983 ± 0.0001 g

| Results                 | 40(a)/36(a) ± 2σ         | 40(r)/39(k) ± 2σ             | Age ± 2σ (Ma)                                                                    | MSWD                          | 39Ar(k) (% ,n)                                            | K/Ca ± 2σ       |
|-------------------------|--------------------------|------------------------------|----------------------------------------------------------------------------------|-------------------------------|-----------------------------------------------------------|-----------------|
| <b>Age Plateau</b>      |                          | 3.76809 ± 0.11755<br>± 3.12% | 12.14 ± 0.38<br>± 3.13%<br>Full External Error ± 0.47<br>Analytical Error ± 0.38 | 1.17<br>29%<br>1.73<br>1.0825 | 81.93<br>16<br>2σ Confidence Limit<br>Error Magnification | 0.0014 ± 0.0002 |
| <b>Total Fusion Age</b> |                          | 3.99248 ± 0.10531<br>± 2.64% | 12.86 ± 0.34<br>± 2.65%<br>Full External Error ± 0.45<br>Analytical Error ± 0.34 |                               | 22                                                        | 0.0015 ± 0.0000 |
| <b>Normal Isochron</b>  | 296.19 ± 2.88<br>± 0.97% | 3.73027 ± 0.15011<br>± 4.02% | 12.02 ± 0.48<br>± 4.02%<br>Full External Error ± 0.55<br>Analytical Error ± 0.48 | 1.28<br>21%<br>1.76<br>1.1294 | 81.93<br>16<br>2σ Confidence Limit<br>Error Magnification |                 |
|                         |                          |                              |                                                                                  | 9<br>0.0000265155             | Number of Iterations<br>Convergence                       |                 |
| <b>Inverse Isochron</b> | 296.13 ± 2.84<br>± 0.96% | 3.75175 ± 0.14707<br>± 3.92% | 12.09 ± 0.47<br>± 3.92%<br>Full External Error ± 0.55<br>Analytical Error ± 0.47 | 1.23<br>24%<br>1.76<br>1.1104 | 81.93<br>16<br>2σ Confidence Limit<br>Error Magnification |                 |
|                         |                          |                              |                                                                                  | 2<br>0.0006435031             | Number of Iterations<br>Convergence                       |                 |
|                         |                          |                              |                                                                                  | 48%                           | Spreading Factor                                          |                 |

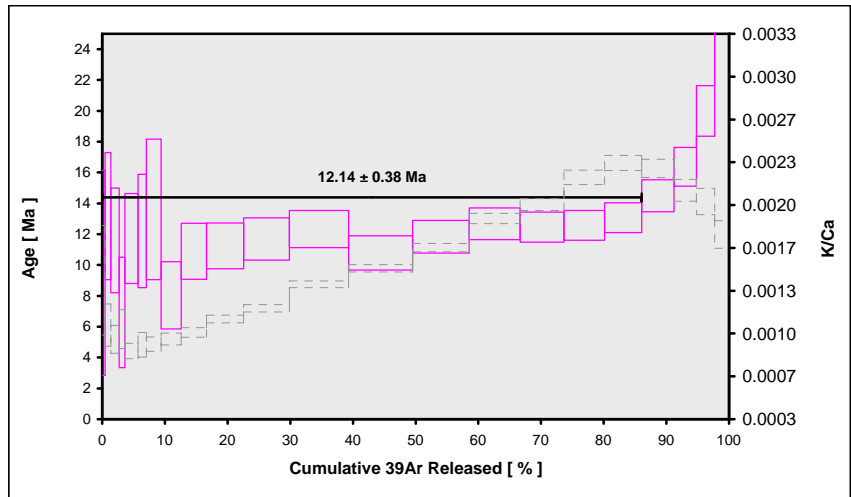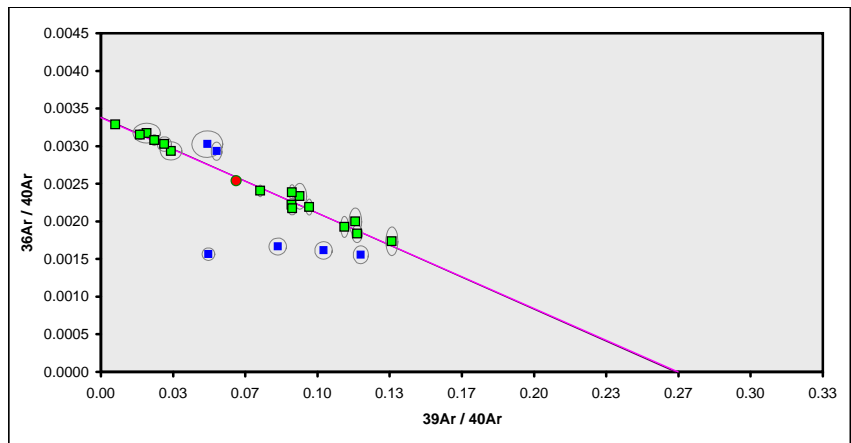

350 U1437E 56R-5 126-130 > IODP U1437E > Groundmass > IBM | IODP 350 (14-INT-02)  
15-OSU-04 (4A2-15) > Incremental Heating > Kevin Konrad

Information on Analysis  
and Constants Used in Calculations

Sample = 350 U1437E 56R-5 126-130  
Material = Groundmass  
Location = IODP U1437E  
Analyst = Kevin Konrad  
Project = IBM | IODP 350 (14-INT-02)  
Mass Discrimination Law = LIN  
Irradiation = 15-OSU-04 (4A2-15)  
J = 0.00181665 ± 0.00000305  
FCT-NM = 28.201 ± 0.023 Ma  
IGSN = N/A  
Preferred Age = Plateau Age  
Classification = Eruption Age  
Experiment Type = Incremental Heating  
Extraction Method = In Situ Laser Heating  
Heating = 0 sec  
Isolation = 3.00 min  
Instrument = ARGUS-VI-D  
Lithology = Andesitic Tuff  
Lat-Lon = Undefined - Undefined  
Collector Calibrations = 36Ar  
Age Equations = Min et al. (2000)  
Negative Intensities = Allowed  
Decay Constant 40K = 5.530 ± 0.048 E-10 1/a  
Decay Constant 39Ar = 2.940 ± 0.016 E-07 1/h  
Decay Constant 37Ar = 8.230 ± 0.012 E-04 1/h  
Decay Constant 36Cl = 2.257 ± 0.015 E-06 1/a  
Decay Constant 40K(EC,β<sup>+</sup>) = 0.580 ± 0.009 E-10 1/a  
Decay Constant 40K(β<sup>-</sup>) = 4.950 ± 0.043 E-10 1/a  
Atmospheric Ratio 40/36(a) = 295.50  
Atmospheric Ratio 38/36(a) = 0.1869  
Production Ratio 39/37(ca) = 0.000676 ± 0.000009  
Production Ratio 38/37(ca) = 0.000072 ± 0.000009  
Production Ratio 36/37(ca) = 0.000266 ± 0.000000  
Production Ratio 40/39(k) = 0.003823 ± 0.000102  
Production Ratio 38/39(k) = 0.012031 ± 0.000019  
Production Ratio 36/38(cl) = 262.80 ± 1.71  
Scaling Ratio K/Ca = 0.430  
Abundance Ratio 40K/K = 1.1700 ± 0.0100 E-04  
Atomic Weight K = 39.0983 ± 0.0001 g

| Results                 | 40(a)/36(a) ± 2σ         | 40(r)/39(k) ± 2σ             | Age ± 2σ<br>(Ma)                                                                | MSWD                          | 39Ar(k)<br>(%,n)                                         | K/Ca ± 2σ       |
|-------------------------|--------------------------|------------------------------|---------------------------------------------------------------------------------|-------------------------------|----------------------------------------------------------|-----------------|
| <b>Age Plateau</b>      |                          | 2.65702 ± 0.03432<br>± 1.29% | 8.71 ± 0.12<br>± 1.33%<br>Full External Error ± 0.23<br>Analytical Error ± 0.11 | 1.14<br>33%<br>2.00<br>1.0684 | 41.51<br>9<br>2σ Confidence Limit<br>Error Magnification | 0.0136 ± 0.0025 |
| <b>Total Fusion Age</b> |                          | 2.51531 ± 0.01928<br>± 0.77% | 8.24 ± 0.07<br>± 0.83%<br>Full External Error ± 0.20<br>Analytical Error ± 0.06 |                               | 22                                                       | 0.0205 ± 0.0001 |
| <b>Normal Isochron</b>  | 299.31 ± 5.65<br>± 1.89% | 2.60139 ± 0.08772<br>± 3.37% | 8.53 ± 0.29<br>± 3.38%<br>Full External Error ± 0.35<br>Analytical Error ± 0.29 | 1.03<br>41%<br>2.07<br>1.0158 | 41.51<br>9<br>2σ Confidence Limit<br>Error Magnification |                 |
|                         |                          |                              |                                                                                 | 6<br>0.0000181379             | Number of Iterations<br>Convergence                      |                 |
| <b>Inverse Isochron</b> | 299.36 ± 5.63<br>± 1.88% | 2.60182 ± 0.08711<br>± 3.35% | 8.53 ± 0.29<br>± 3.36%<br>Full External Error ± 0.34<br>Analytical Error ± 0.28 | 1.03<br>41%<br>2.07<br>1.0147 | 41.51<br>9<br>2σ Confidence Limit<br>Error Magnification |                 |
|                         |                          |                              |                                                                                 | 3<br>0.0000134130             | Number of Iterations<br>Convergence                      |                 |
|                         |                          |                              |                                                                                 | 24%                           | Spreading Factor                                         |                 |

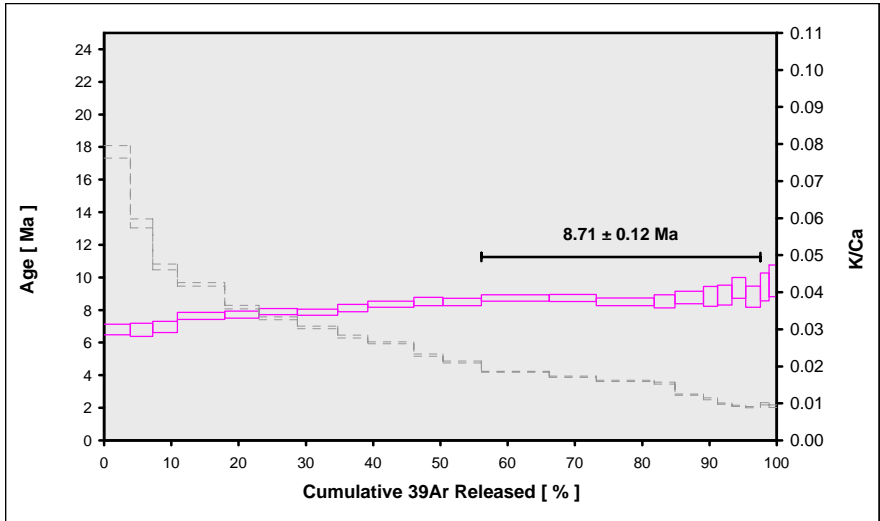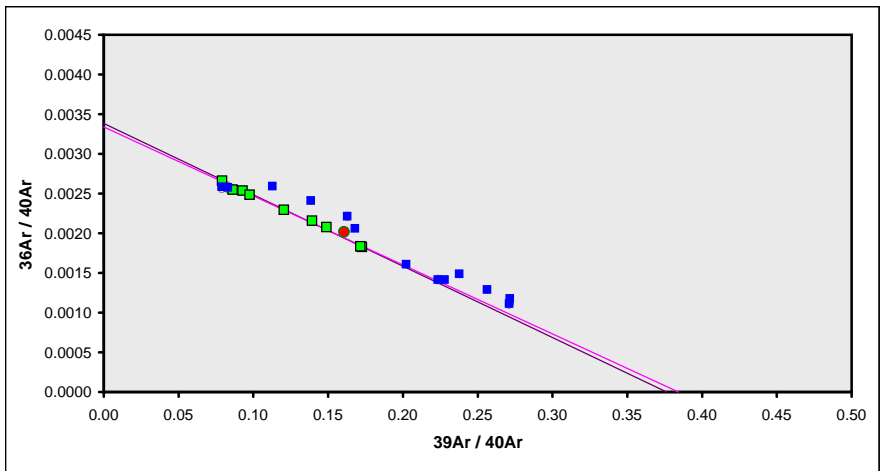

350 U1437E 56R-5 126-130 > IODP U1437E > Plagioclase > IBM | IODP 350 (14-INT-02)  
15-OSU-04 (4A3-15) > Incremental Heating > Kevin Konrad

Information on Analysis  
and Constants Used in Calculations

Sample = 350 U1437E 56R-5 126-130  
Material = Plagioclase  
Location = IODP U1437E  
Analyst = Kevin Konrad  
Project = IBM | IODP 350 (14-INT-02)  
Mass Discrimination Law = LIN  
Irradiation = 15-OSU-04 (4A3-15)  
J = 0.00181402 ± 0.00000303  
FCT-NM = 28.201 ± 0.023 Ma  
IGSN = N/A  
Preferred Age = Plateau Age  
Classification = Crystallization Age  
Experiment Type = Incremental Heating  
Extraction Method = In Situ Laser Heating  
Heating = 0 sec  
Isolation = 3.00 min  
Instrument = ARGUS-VI-D  
Lithology = Andesitic Tuff  
Lat-Lon = Undefined - Undefined  
Collector Calibrations = 36Ar  
Age Equations = Min et al. (2000)  
Negative Intensities = Allowed  
Decay Constant 40K = 5.530 ± 0.048 E-10 1/a  
Decay Constant 39Ar = 2.940 ± 0.016 E-07 1/h  
Decay Constant 37Ar = 8.230 ± 0.012 E-04 1/h  
Decay Constant 36Cl = 2.257 ± 0.015 E-06 1/a  
Decay Constant 40K(EC,β<sup>+</sup>) = 0.580 ± 0.009 E-10 1/a  
Decay Constant 40K(β<sup>-</sup>) = 4.950 ± 0.043 E-10 1/a  
Atmospheric Ratio 40/36(a) = 295.50  
Atmospheric Ratio 38/36(a) = 0.1869  
Production Ratio 39/37(ca) = 0.000676 ± 0.000009  
Production Ratio 38/37(ca) = 0.000072 ± 0.000009  
Production Ratio 36/37(ca) = 0.000266 ± 0.000000  
Production Ratio 40/39(k) = 0.003823 ± 0.000102  
Production Ratio 38/39(k) = 0.012031 ± 0.000019  
Production Ratio 36/38(cl) = 262.80 ± 1.71  
Scaling Ratio K/Ca = 0.430  
Abundance Ratio 40K/K = 1.1700 ± 0.0100 E-04  
Atomic Weight K = 39.0983 ± 0.0001 g

| Results                              | 40(a)/36(a) ± 2σ      | 40(r)/39(k) ± 2σ           | Age ± 2σ (Ma)                                                                 | MSWD                 | 39Ar(k) (%.n)                                                                                                        | K/Ca ± 2σ       |
|--------------------------------------|-----------------------|----------------------------|-------------------------------------------------------------------------------|----------------------|----------------------------------------------------------------------------------------------------------------------|-----------------|
| Age Plateau                          |                       | 2.60811 ± 0.20562 ± 7.88%  | 8.54 ± 0.67 ± 7.87%<br>Full External Error ± 0.70<br>Analytical Error ± 0.67  | 1.61<br>6%<br>1.2691 | 74.02<br>16<br>2σ Confidence Limit<br>Error Magnification                                                            | 0.0020 ± 0.0001 |
| Total Fusion Age                     |                       | 2.45833 ± 0.14124 ± 5.75%  | 8.05 ± 0.46 ± 5.74%<br>Full External Error ± 0.50<br>Analytical Error ± 0.46  |                      | 24                                                                                                                   | 0.0023 ± 0.0000 |
| Normal Isochron                      | 295.81 ± 4.09 ± 1.38% | 2.54923 ± 0.72217 ± 28.33% | 8.34 ± 2.36 ± 28.27%<br>Full External Error ± 2.37<br>Analytical Error ± 2.36 | 1.72<br>4%<br>1.3113 | 74.02<br>16<br>2σ Confidence Limit<br>Error Magnification<br>Number of Iterations<br>Convergence                     |                 |
| Inverse Isochron<br>Clustered Points | 295.81 ± 4.09 ± 1.38% | 2.55856 ± 0.63569 ± 24.85% | 8.37 ± 2.08 ± 24.79%<br>Full External Error ± 2.08<br>Analytical Error ± 2.08 | 1.73<br>4%<br>1.3159 | 74.02<br>16<br>2σ Confidence Limit<br>Error Magnification<br>Number of Iterations<br>Convergence<br>Spreading Factor |                 |

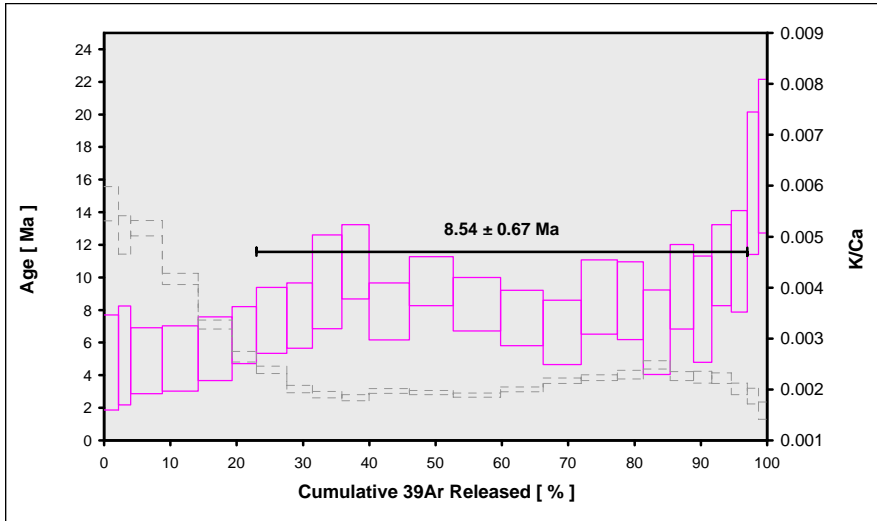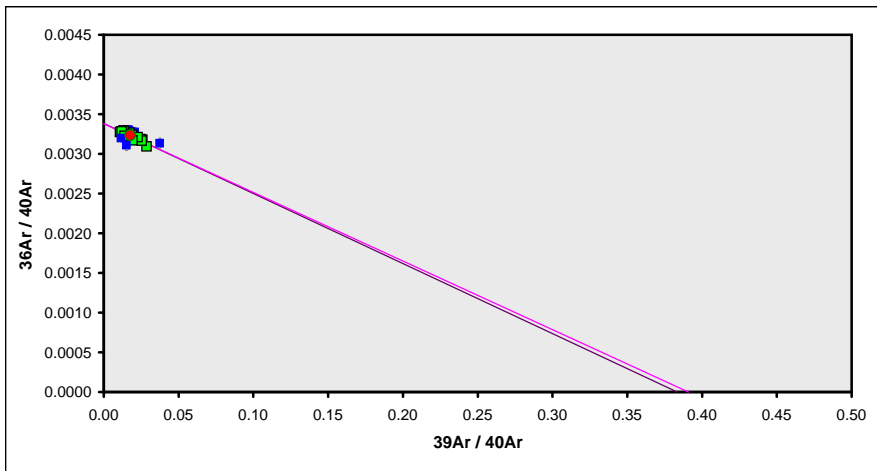

350 U1437E 57R-2 27-32 > IODP U1437E > Groundmass > IBM | IODP 350 (14-INT-02)  
15-OSU-04 (4A6-15) > Incremental Heating > Kevin Konrad

Information on Analysis  
and Constants Used in Calculations

Sample = 350 U1437E 57R-2 27-32  
Material = Groundmass  
Location = IODP U1437E  
Analyst = Kevin Konrad  
Project = IBM | IODP 350 (14-INT-02)  
Mass Discrimination Law = LIN  
Irradiation = 15-OSU-04 (4A6-15)  
J = 0.00180607 ± 0.00000302  
FCT-NM = 28.201 ± 0.023 Ma  
IGSN = N/A  
Preferred Age = Plateau Age  
Classification = Eruption Age  
Experiment Type = Incremental Heating  
Extraction Method = In Situ Laser Heating  
Heating = 0 sec  
Isolation = 3.00 min  
Instrument = ARGUS-VI-D  
Lithology = Andesite  
Lat-Lon = Undefined - Undefined  
Collector Calibrations = 36Ar  
Age Equations = Min et al. (2000)  
Negative Intensities = Allowed  
Decay Constant 40K = 5.530 ± 0.048 E-10 1/a  
Decay Constant 39Ar = 2.940 ± 0.016 E-07 1/h  
Decay Constant 37Ar = 8.230 ± 0.012 E-04 1/h  
Decay Constant 36Cl = 2.257 ± 0.015 E-06 1/a  
Decay Constant 40K(EC,β<sup>+</sup>) = 0.580 ± 0.009 E-10 1/a  
Decay Constant 40K(β<sup>-</sup>) = 4.950 ± 0.043 E-10 1/a  
Atmospheric Ratio 40/36(a) = 305.90 ± 7.59  
Atmospheric Ratio 38/36(a) = 0.1869 ± 0.0019  
Production Ratio 39/37(ca) = 0.000676 ± 0.000009  
Production Ratio 38/37(ca) = 0.000072 ± 0.000009  
Production Ratio 36/37(ca) = 0.000266 ± 0.000000  
Production Ratio 40/39(k) = 0.003823 ± 0.000102  
Production Ratio 38/39(k) = 0.012031 ± 0.000019  
Production Ratio 36/38(cl) = 262.80 ± 1.71  
Scaling Ratio K/Ca = 0.430  
Abundance Ratio 40K/K = 1.1700 ± 0.0100 E-04  
Atomic Weight K = 39.0983 ± 0.0001 g

| Results                                          | 40(a)/36(a) ± 2σ         | 40(r)/39(k) ± 2σ             | Age ± 2σ<br>(Ma)                                      | MSWD               | 39Ar(k)<br>(%,n)                           | K/Ca ± 2σ       |
|--------------------------------------------------|--------------------------|------------------------------|-------------------------------------------------------|--------------------|--------------------------------------------|-----------------|
| <b>Age Plateau</b><br><b>Overestimated Error</b> |                          | 2.72819 ± 0.03890<br>± 1.43% | 8.89 ± 0.13<br>± 1.46%                                | 0.25<br>99%        | 37.44<br>10                                | 0.0158 ± 0.0037 |
|                                                  |                          |                              | Full External Error ± 0.24<br>Analytical Error ± 0.13 | 1.94<br>1.0000     | 2σ Confidence Limit<br>Error Magnification |                 |
| <b>Total Fusion Age</b>                          |                          | 2.51708 ± 0.02430<br>± 0.97% | 8.20 ± 0.08<br>± 1.02%                                |                    | 22                                         | 0.0264 ± 0.0001 |
|                                                  |                          |                              | Full External Error ± 0.20<br>Analytical Error ± 0.08 |                    |                                            |                 |
| <b>Normal Isochron</b>                           | 303.67 ± 6.32<br>± 2.08% | 2.74045 ± 0.04377<br>± 1.60% | 8.93 ± 0.15<br>± 1.63%                                | 0.73<br>66%        | 37.44<br>10                                |                 |
|                                                  |                          |                              | Full External Error ± 0.25<br>Analytical Error ± 0.14 | 2.00<br>1.0000     | 2σ Confidence Limit<br>Error Magnification |                 |
|                                                  |                          |                              |                                                       | 29<br>0.0000268432 | Number of Iterations<br>Convergence        |                 |
| <b>Inverse Isochron</b>                          | 303.82 ± 6.35<br>± 2.09% | 2.74066 ± 0.04397<br>± 1.60% | 8.93 ± 0.15<br>± 1.63%                                | 0.75<br>65%        | 37.44<br>10                                |                 |
|                                                  |                          |                              | Full External Error ± 0.25<br>Analytical Error ± 0.14 | 2.00<br>1.0000     | 2σ Confidence Limit<br>Error Magnification |                 |
|                                                  |                          |                              |                                                       | 3<br>0.0000340427  | Number of Iterations<br>Convergence        |                 |
|                                                  |                          |                              |                                                       | 49%                | Spreading Factor                           |                 |

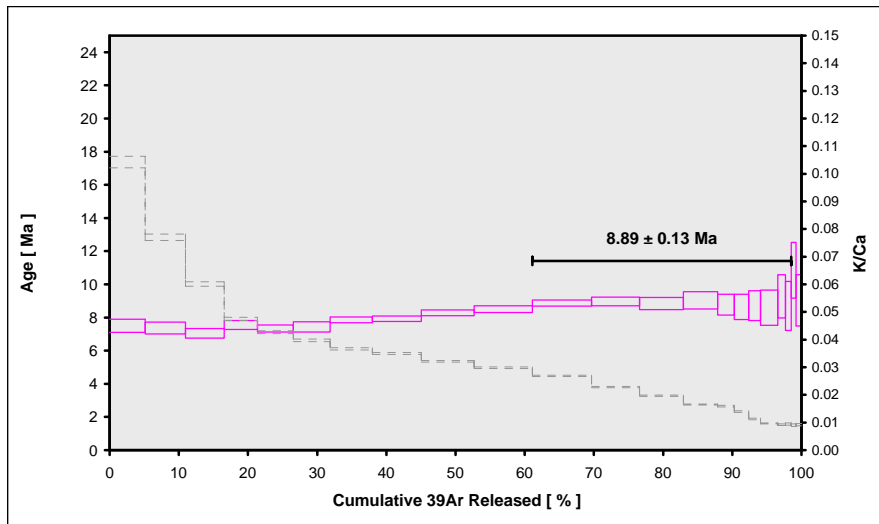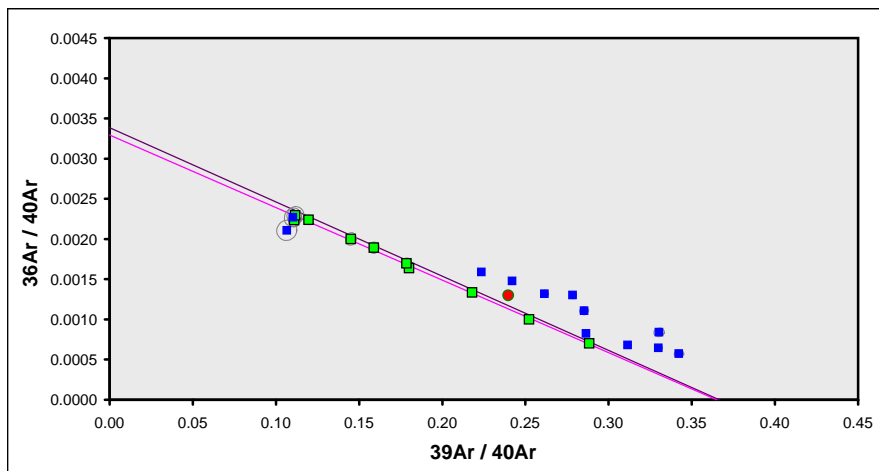

350 U1437E 57R-2 27-32 > IODP U1437E > Plagioclase > IBM | IODP 350 (14-INT-02)  
15-OSU-04 (4A7-15) > Incremental Heating > Kevin Konrad

Information on Analysis  
and Constants Used in Calculations

Sample = 350 U1437E 57R-2 27-32  
Material = Plagioclase  
Location = IODP U1437E  
Analyst = Kevin Konrad  
Project = IBM | IODP 350 (14-INT-02)  
Mass Discrimination Law = LIN  
Irradiation = 15-OSU-04 (4A7-15)  
J = 0.00180253 ± 0.00000299  
FCT-NM = 28.201 ± 0.023 Ma  
IGSN = N/A  
Preferred Age = Plateau Age  
Classification = Crystallization Age  
Experiment Type = Incremental Heating  
Extraction Method = In Situ Laser Heating  
Heating = 0 sec  
Isolation = 3.00 min  
Instrument = ARGUS-VI-D  
Lithology = Andesite  
Lat-Lon = Undefined - Undefined  
Collector Calibrations = <sup>36</sup>Ar  
Age Equations = Min et al. (2000)  
Negative Intensities = Allowed  
Decay Constant <sup>40</sup>K = 5.530 ± 0.048 E-10 1/a  
Decay Constant <sup>39</sup>Ar = 2.940 ± 0.016 E-07 1/h  
Decay Constant <sup>37</sup>Ar = 8.230 ± 0.012 E-04 1/h  
Decay Constant <sup>36</sup>Cl = 2.257 ± 0.015 E-06 1/a  
Decay Constant <sup>40</sup>K(EC,β<sup>+</sup>) = 0.580 ± 0.009 E-10 1/a  
Decay Constant <sup>40</sup>K(β<sup>-</sup>) = 4.950 ± 0.043 E-10 1/a  
Atmospheric Ratio <sup>40</sup>Ar/<sup>36</sup>Ar = 295.50  
Atmospheric Ratio <sup>38</sup>Ar/<sup>36</sup>Ar = 0.1869  
Production Ratio <sup>39</sup>Ar/<sup>37</sup>Ar(ca) = 0.000676 ± 0.000009  
Production Ratio <sup>38</sup>Ar/<sup>37</sup>Ar(ca) = 0.000072 ± 0.000009  
Production Ratio <sup>36</sup>Ar/<sup>37</sup>Ar(ca) = 0.000266 ± 0.000000  
Production Ratio <sup>40</sup>Ar/<sup>39</sup>Ar(k) = 0.003823 ± 0.000102  
Production Ratio <sup>38</sup>Ar/<sup>39</sup>Ar(k) = 0.012031 ± 0.000019  
Production Ratio <sup>36</sup>Ar/<sup>38</sup>Ar(cl) = 262.80 ± 1.71  
Scaling Ratio K/Ca = 0.430  
Abundance Ratio <sup>40</sup>K/K = 1.1700 ± 0.0100 E-04  
Atomic Weight K = 39.0983 ± 0.0001 g

| Results          | 40(a)/36(a) ± 2σ      | 40(r)/39(k) ± 2σ          | Age ± 2σ (Ma)              | MSWD         | <sup>39</sup> Ar(k) (%.n) | K/Ca ± 2σ       |
|------------------|-----------------------|---------------------------|----------------------------|--------------|---------------------------|-----------------|
| Age Plateau      |                       | 3.20575 ± 0.13234 ± 4.13% | 10.42 ± 0.43 ± 4.13%       | 1.29         | 98.31                     | 0.0020 ± 0.0001 |
|                  |                       |                           | Full External Error ± 0.49 | 1.60         | 2σ Confidence Limit       |                 |
|                  |                       |                           | Analytical Error ± 0.43    | 1.1379       | Error Magnification       |                 |
| Total Fusion Age |                       | 3.22736 ± 0.12257 ± 3.80% | 10.49 ± 0.40 ± 3.80%       |              | 24                        | 0.0020 ± 0.0000 |
|                  |                       |                           | Full External Error ± 0.46 |              |                           |                 |
|                  |                       |                           | Analytical Error ± 0.40    |              |                           |                 |
| Normal Isochron  | 294.65 ± 2.91 ± 0.99% | 3.27301 ± 0.27680 ± 8.46% | 10.64 ± 0.90 ± 8.44%       | 1.35         | 98.31                     |                 |
|                  |                       |                           | Full External Error ± 0.93 | 13%          | 23                        |                 |
|                  |                       |                           | Analytical Error ± 0.90    | 1.1604       | 2σ Confidence Limit       |                 |
|                  |                       |                           |                            | 6            | Error Magnification       |                 |
|                  |                       |                           |                            |              | Number of Iterations      |                 |
|                  |                       |                           |                            | 0.0000065519 | Convergence               |                 |
| Inverse Isochron | 294.70 ± 2.92 ± 0.99% | 3.27838 ± 0.27288 ± 8.32% | 10.65 ± 0.88 ± 8.31%       | 1.36         | 98.31                     |                 |
|                  |                       |                           | Full External Error ± 0.92 | 12%          | 23                        |                 |
|                  |                       |                           | Analytical Error ± 0.88    | 1.62         | 2σ Confidence Limit       |                 |
|                  |                       |                           |                            | 1.1670       | Error Magnification       |                 |
|                  |                       |                           |                            | 3            | Number of Iterations      |                 |
|                  |                       |                           |                            | 0.0000021984 | Convergence               |                 |
|                  |                       |                           |                            | 21%          | Spreading Factor          |                 |

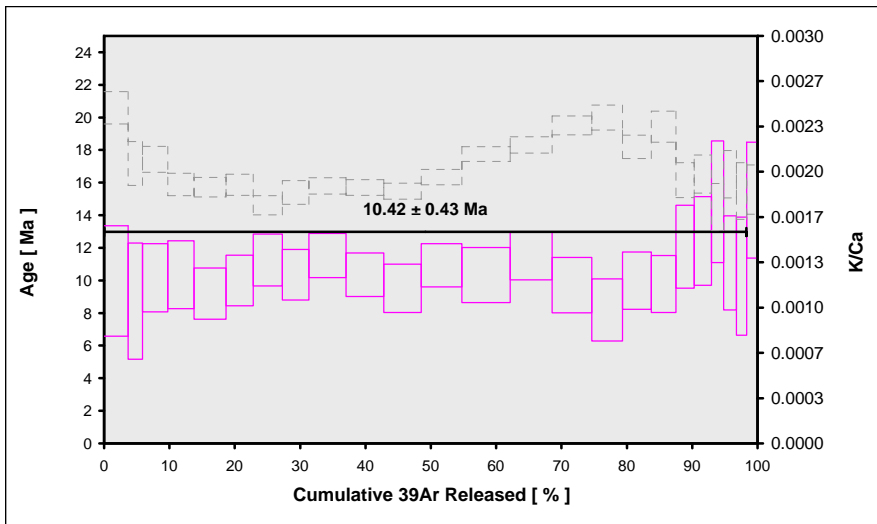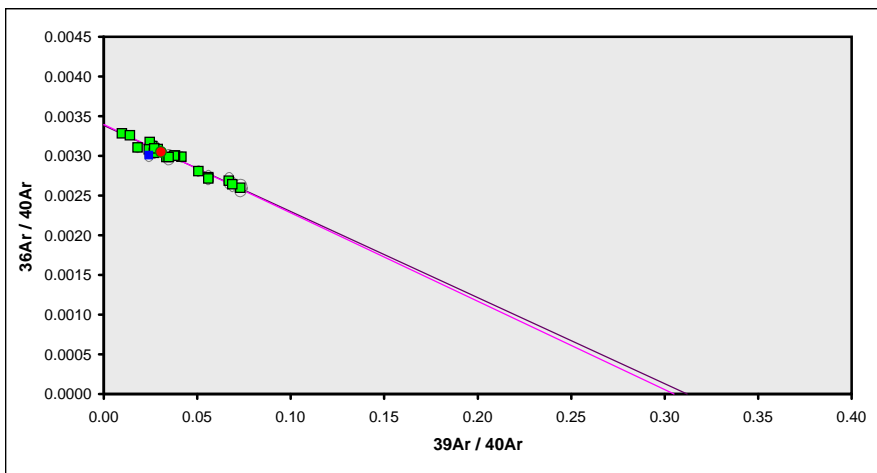

Supplement: Supplementary file 1 [file 1]
